# Supplementary material for: Extrusion-based 3D printed magnesium scaffolds with multifunctional MgF2and MgF2–CaP coatings
Source: Royal Society of Chemistry journal article supplement (doi:10.1039/d1bm01238j), 2021-01-01
Supplement: d1bm01238j1.pdf [file d1bm01238j1.pdf]

## Supplementary material

### Methods

Differential scanning calorimetry (DSC) was performed to monitor the effect of heating on the phase transitions of the pure magnesium (Mg) powder using a DSC instrument (DSC 404, Netzsch-Gerätebau GmbH, Germany). The sample underwent a heating process from 25 to 590 °C at a heating rate of 20 °C/min and then from 590 to 700 °C at a heating rate of 5 °C/min.

The surface morphologies and cross-section microstructures of the struts of the Mg scaffolds coated under different conditions were observed using SEM (JSM-IT100, JEOL, Japan). Back scatter mode was applied for the observation of the cross-section microstructures of the scaffold struts.

*In vitro* immersion tests of the Mg scaffold samples coated under different conditions were conducted in modified simulated body fluid (r-SBF) in a thermal bath at 37 °C for 6 h. The samples after *in vitro* biodegradation at different time points were imaged.

### Results

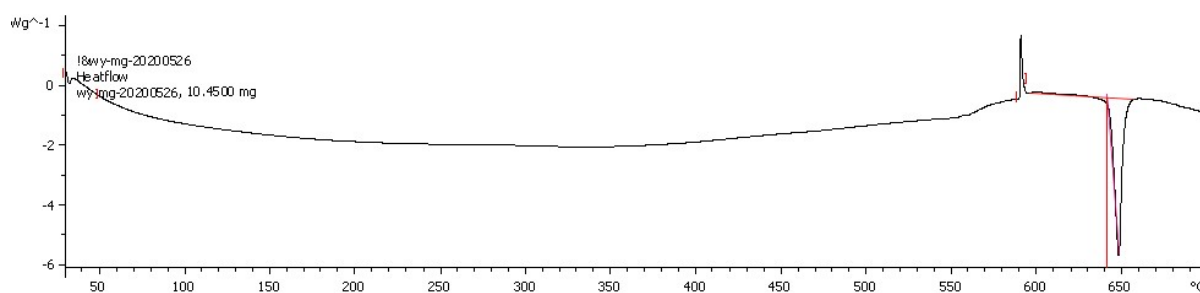

Fig. S1 DSC curve of the pure Mg powder.

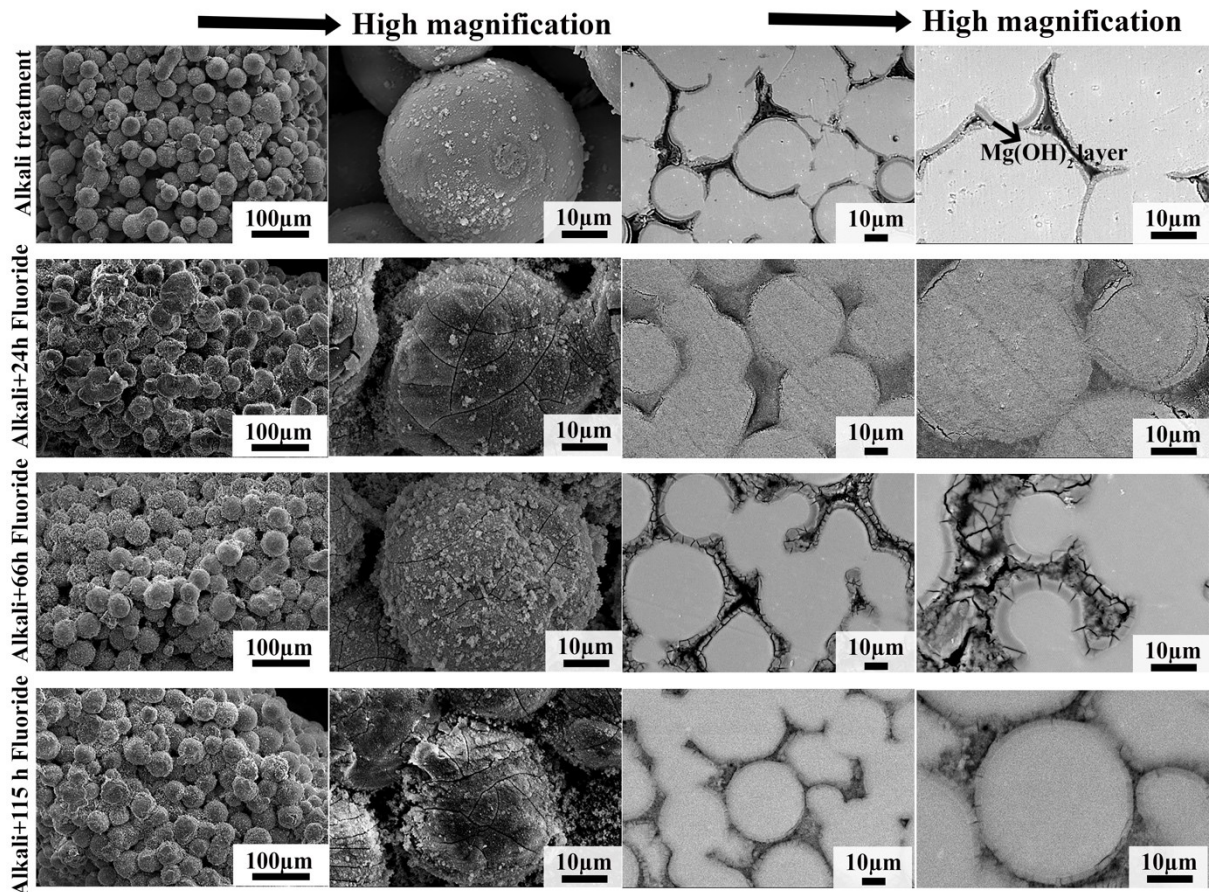

Fig. S2 Surface morphologies and cross-section microstructures of the coatings formed under different conditions.

| Degradation                               | 0 h | 5 h | 20 h | 24 h | 48 h | 72 h | 96 h | 144 h |
|-------------------------------------------|-----|-----|------|------|------|------|------|-------|
| No coating                                |     |     |      |      |      |      |      |       |
| 24h Alkali heat-treatment                 |     |     |      |      |      |      |      |       |
| 24h Alkali heat-treatment+ Fluoride 24h   |     |     |      |      |      |      |      |       |
| 24h Alkali heat-treatment+ Fluoride 66 h  |     |     |      |      |      |      |      |       |
| 24h Alkali heat-treatment+ Fluoride 115 h |     |     |      |      |      |      |      |       |

Fig. S3 Appearances of the Mg scaffolds without and with surface modification under various conditions after *in vitro* biodegradation in r-SBF for up to 144 h.
